# Supplementary material
Source: Springer Nature journal article supplement (https://www.springermedizin.de/resource/supplementary/12933_2013_901_MOESM1_ESM.pdf/9539268)
Supplement: MOESM1 [file 9539268]

## SUPPORTING MATERIAL

Figure S1: Flow-chart of the participants

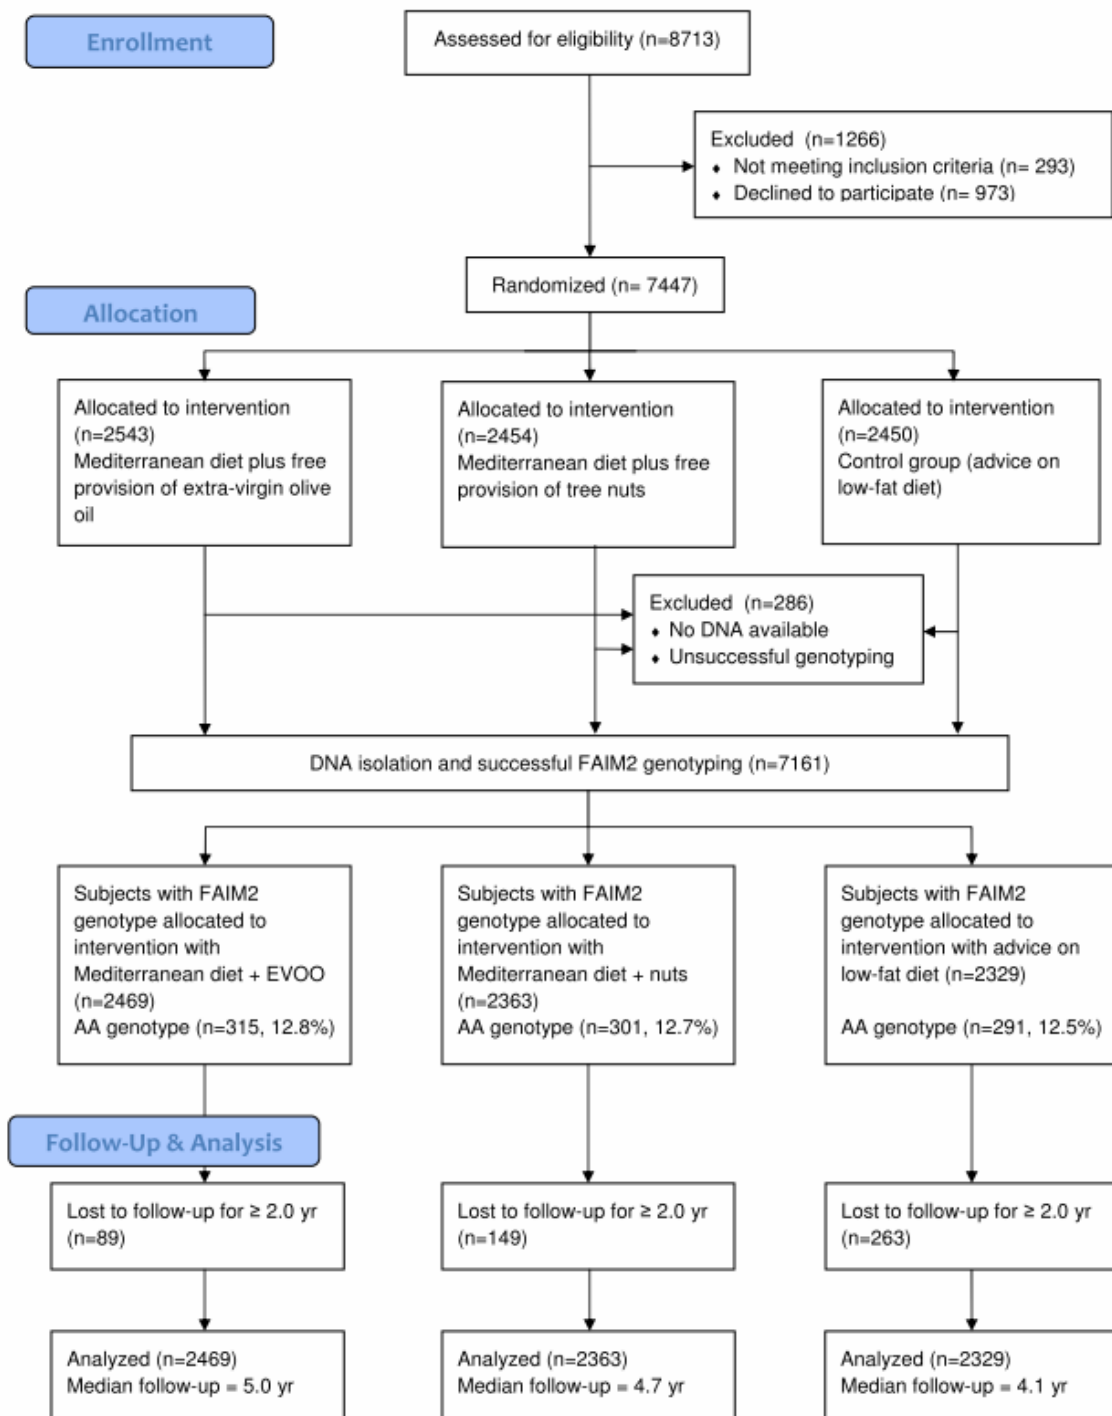

**Figure S2. Interaction between the *FAIM2*-rs7138803 polymorphism and adherence to the MedDiet in determining BMI (A) and heart rate (B).**

Adjusted means depending on the strata of adherence to the Mediterranean diet (MedDiet) and the *FAIM2*-rs7138803. MedDiet was considered as dichotomous (low <9 points and high  $\geq 9$  points). Means were adjusted for sex, age, centre, type 2 diabetes, medications, smoking, drinking, physical activity and total energy intake. The model for the polymorphism was additive for BMI (n=7,161) and recessive for heart rate (n=6,937). P-values for the interaction terms were multivariable adjusted. Error bars: SE of means.

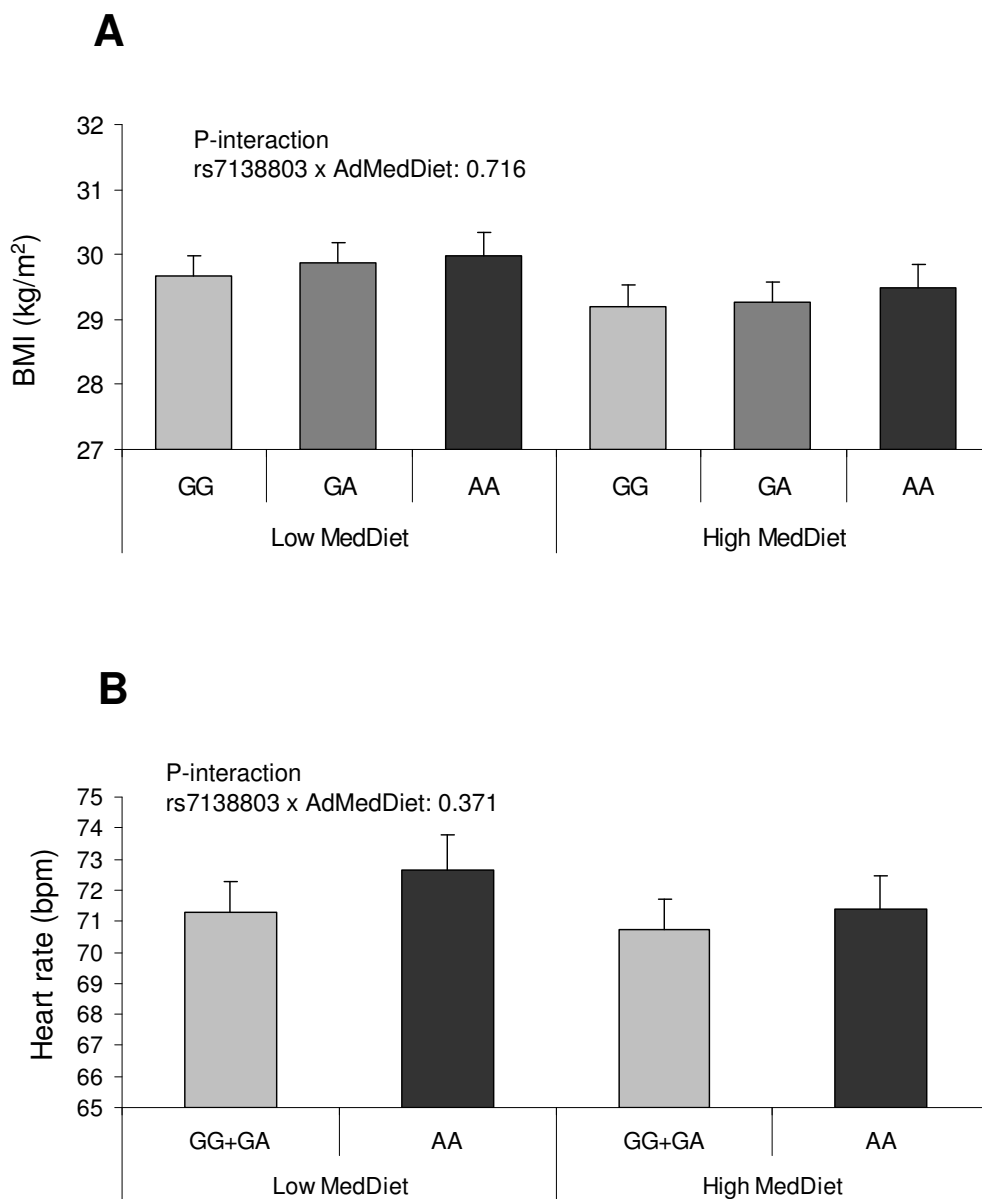

**Figure S3. Stratified analysis of the association between the *FAIM2*-rs7138803 and diastolic blood pressure (DBP) (A) and heart rate (B) depending on hypertension.** Adjusted means depending on the hypertensive status diagnosed at baseline (yes or not) and the *FAIM2*-rs7138803. Means were adjusted for sex, age, centre, type 2 diabetes, medications, smoking, drinking, physical activity and total energy intake. The model for the polymorphism was additive for DBP (n=7,129) and recessive for heart rate (n=6,937). P-values for the interaction terms were multivariable adjusted. Multivariable adjusted P-values for the polymorphism in determining DBP were 0.089 and 0.036 in non-hypertensive subjects and hypertensive subjects, respectively. P-values for the polymorphism in determining heart rate in the same strata were 0.401 and 0.016, respectively. \*P<0.017. Error bars: SE of means.

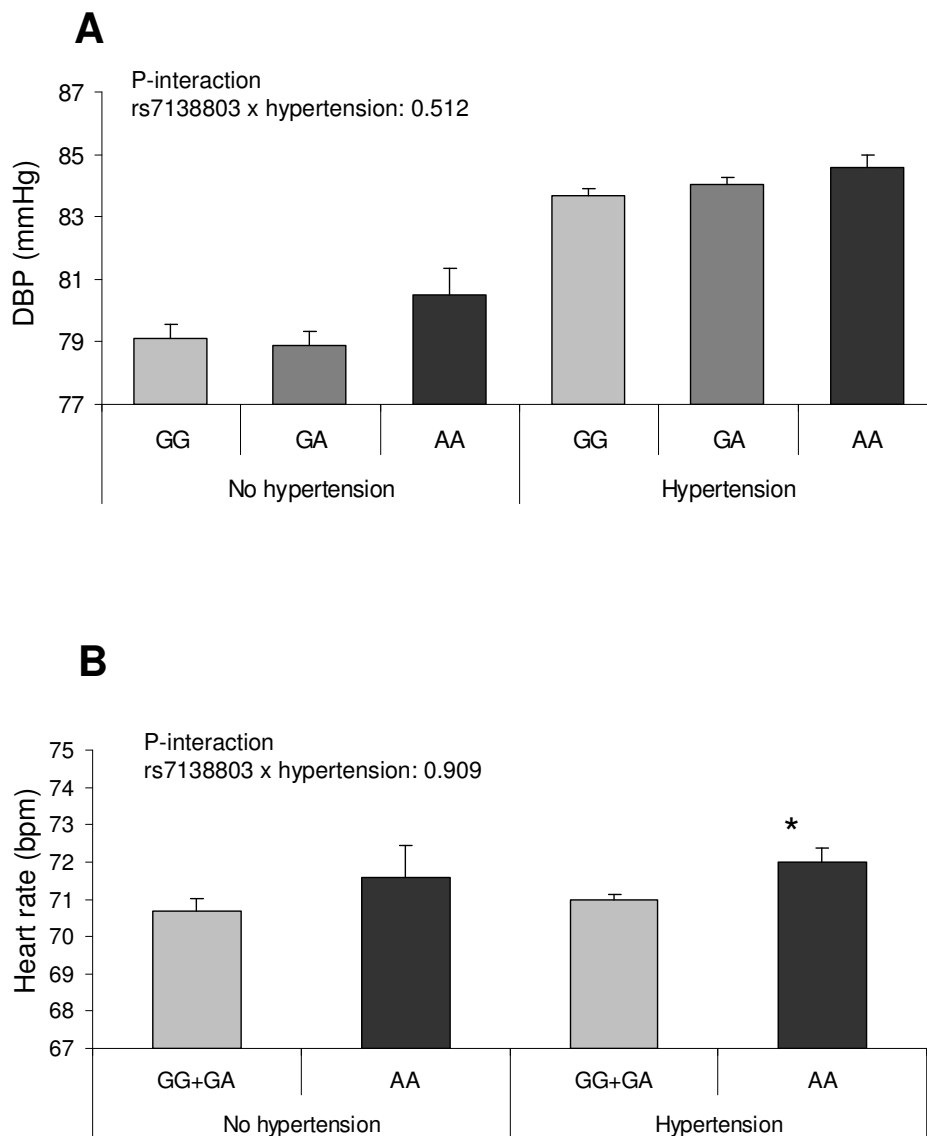

**Supplemental Table 1: Demographic, lifestyle, clinical and biochemical characteristics of the participants depending on the *FAIM2*-rs7138803 polymorphism**

| Parameter                              | GG<br>(n=3,019) |        | GA<br>(n=3,235) |        | AA<br>(n=907) |        | P <sup>1</sup> |
|----------------------------------------|-----------------|--------|-----------------|--------|---------------|--------|----------------|
|                                        | Mean            | SD     | Mean            | SD     | Mean          | SD     |                |
| Age (years)                            | 67.0            | ± 6.2  | 66.9            | (6.2)  | 66.9          | (6.3)  | 0.528          |
| Energy intake (kcal/d)                 | 2274            | ± 605  | 2276            | ± 604  | 2275          | ± 601  | 0.988          |
| Total fat (% energy)                   | 39.2            | ± 6.8  | 39.2            | ± 6.8  | 39.1          | ± 6.5  | 0.963          |
| Saturated fat (% energy)               | 10.0            | ± 2.3  | 10.0            | ± 2.2  | 10.0          | ± 2.2  | 0.901          |
| MUFA (% energy)                        | 19.4            | ± 4.6  | 19.4            | ± 4.6  | 19.4          | ± 4.3  | 0.511          |
| Proteins (% energy)                    | 16.6            | ± 2.8  | 16.5            | ± 2.8  | 16.6          | ± 2.8  | 0.608          |
| Carbohydrates (% energy)               | 41.9            | ± 7.2  | 41.8            | ± 7.2  | 41.9          | ± 6.9  | 0.939          |
| Adherence to the MedDiet               | 8.6             | ± 2.0  | 8.7             | ± 2.0  | 8.6           | ± 2.0  | 0.447          |
| Alcohol consumption (g/d)              | 8.4             | ± 14.3 | 8.5             | ± 14.1 | 8.2           | ± 14.1 | 0.790          |
| Physical activity (MET-min/day)        | 231             | ± 232  | 235             | ± 254  | 224           | ± 211  | 0.447          |
| Fasting glucose <sup>^</sup> (mg/dL)   | 121.0           | ± 41.4 | 122.6           | ± 41.5 | 122.9         | ± 42.1 | 0.294          |
| Total cholesterol <sup>^</sup> (mg/dL) | 111.6           | ± 38.4 | 110.8           | ± 40.4 | 110.2         | ± 38.2 | 0.575          |
| LDL-C <sup>^</sup> (mg/dL)             | 130.8           | ± 34.1 | 130.0           | ± 35.9 | 129.7         | ± 34.7 | 0.576          |
| HDL-C <sup>^</sup> (mg/dL)             | 54.3            | ± 14.5 | 53.4            | ± 13.9 | 53.7          | ± 13.3 | 0.068          |
| Triglycerides <sup>^</sup> (mg/dL)     | 135.0           | ± 75.9 | 139.2           | ± 82.2 | 137.9         | ± 76.3 | 0.133          |
| Female sex : n, %                      | 1761            | (58.3) | 1847            | (57.1) | 504           | (55.6) | 0.296          |
| Type 2 diabetes: n, %                  | 1436            | (47.6) | 1570            | (48.5) | 546           | (50.3) | 0.344          |
| Hypertension: n, %                     | 2492            | (82.5) | 2687            | (83.1) | 749           | (84.6) | 0.851          |
| Dyslipidemia: n, %                     | 2180            | (72.2) | 2346            | (72.5) | 646           | (71.2) | 0.743          |
| Antihypertensive drugs: n, %           | 2195            | (72.9) | 2354            | (72.8) | 657           | (72.4) | 0.703          |
| Lipid lowering drugs: n, %             | 1427            | (47.3) | 1581            | (48.9) | 441           | (48.6) | 0.354          |
| Oral antidiabetic drugs: n;%           | 937             | (31.0) | 1026            | (31.7) | 322           | (35.5) | 0.141          |
| Insulin: n, %                          | 197             | (6.5)  | 234             | (7.2)  | 58            | (6.4)  | 0.631          |
| Current smokers: n, %                  | 428             | (14.2) | 439             | (13.6) | 136           | (15.0) | 0.851          |

\*: Values are means and standard deviations (SD) or n (%) or odds ratio, OR and 95% confidence intervals (95% CI)

<sup>1</sup>: Unadjusted P values for mean comparison among genotypes

total energy intake, alcohol consumption, smoking and physical activity.

<sup>^</sup>: Fasting glucose, total cholesterol, LDL-C, HDL-C and triglycerides were obtained for n= 6317, n=6694, n=6612, n=6588, n=6622 subjects, respectively

**Supplemental Table 2: Association between the *FAIM2*-rs7138803 polymorphism and categories of obesity. Prevalence and odds ratios (OR). Unadjusted and adjusted models**

|                                    | <i>FAIM2</i> (G>A) Genotypes |              |            | Unadjusted <sup>1</sup> |                | Adjusted <sup>2</sup> |                |
|------------------------------------|------------------------------|--------------|------------|-------------------------|----------------|-----------------------|----------------|
|                                    | GG (n=3,019)                 | GA (n=3,235) | AA (n=907) | OR* (95%CI)             | P <sup>1</sup> | OR* (95%CI)           | P <sup>2</sup> |
| BMI<25 kg/m <sup>2</sup> , (%)     | 45.8                         | 42.1         | 12.1       | 1 (ref)                 |                | 1 (ref)               |                |
| BMI: 25-30 kg/m <sup>2</sup> , (%) | 42.9                         | 44.9         | 12.1       | 1.07 (0.93-1.22)        | 0.359          | 1.08 (0.94-1.23)      | 0.303          |
| BMI: 30-35 kg/m <sup>2</sup> , (%) | 41.0                         | 46.0         | 13.0       | 1.13 (0.99-1.29)        | 0.082          | 1.13 (0.99-1.30)      | 0.077          |
| BMI >=35 kg/m <sup>2</sup> , (%)   | 39.9                         | 45.4         | 14.6       | 1.19 (1.01-1.40)        | 0.043          | 1.20 (1.01-1.44)      | 0.046          |
| P for trend                        |                              | 0.008        |            |                         |                |                       |                |

Values are prevalences in %, odds ratio (OR) and 95% confidence intervals (CI)

OR: Odds ratio for the corresponding category of BMI in comparison with the reference category (BMI<25 kg/m<sup>2</sup>) for each variant allele (additive model)

<sup>1</sup>: Unadjusted P values for the polymorphism (additive model)

<sup>2</sup>: Models adjusted for sex, age, center, type 2 diabetes, drinking, smoking, physical activity, adherence to Mediterranean diet and total energy intake. Further adjustment for hypertension did not change the statistical significance of results

**Supplemental Table 3. Association between the *FAIM2*-rs7138803 polymorphism and incidence of cardiovascular diseases in the whole population and by type 2 diabetes status. Hazard ratios (HR) and 95% confidence intervals (CI)**

|                                     | Whole population      |             | Type 2 diabetes status     |                        |
|-------------------------------------|-----------------------|-------------|----------------------------|------------------------|
|                                     | (n=7,161)             |             | Type 2 diabetics (n=3,462) | No-diabetics (n=3,699) |
|                                     | HR                    | 95% CI      | HR                         | 95% CI                 |
| <b>Total cardiovascular events*</b> |                       |             |                            |                        |
| <i>FAIM2</i> genotypes (Model 1)    |                       |             |                            |                        |
| G carriers                          | 1.00                  | (ref.)      | 1.00                       | (ref.)                 |
| AA                                  | 1.18                  | (0.84-1.65) | 1.08                       | (0.71-1.63)            |
|                                     | P <sup>1</sup> =0.344 |             | P <sup>1</sup> =0.727      | P <sup>1</sup> =0.293  |
| <i>FAIM2</i> genotypes (Model 2)    |                       |             |                            |                        |
| G carriers                          | 1.00                  | (ref.)      | 1.00                       | (ref.)                 |
| AA                                  | 1.17                  | (0.83-1.62) | 1.07                       | (0.79, 1.64)           |
|                                     | P <sup>2</sup> =0.399 |             | P <sup>2</sup> =0.758      | P <sup>2</sup> =0.303  |
| <b>Myocardial Infarction</b>        |                       |             |                            |                        |
| <i>FAIM2</i> genotypes (Model 1)    |                       |             |                            |                        |
| G carriers                          | 1.00                  | (ref.)      | 1.00                       | (ref.)                 |
| AA                                  | 1.60                  | (0.97-2.64) | 1.83                       | (1.01-3.09)            |
|                                     | P <sup>1</sup> =0.065 |             | P <sup>1</sup> =0.046      | P <sup>1</sup> =0.697  |
| <i>FAIM2</i> genotypes (Model 2)    |                       |             |                            |                        |
| G carriers                          | 1.00                  | (ref.)      | 1.00                       | (ref.)                 |
| AA                                  | 1.59                  | (0.97-2.63) | 1.86                       | (1.03-3.37)            |
|                                     | P <sup>2</sup> =0.068 |             | P <sup>2</sup> =0.041      | P <sup>2</sup> =0.710  |
| <b>Stroke</b>                       |                       |             |                            |                        |
| <i>FAIM2</i> genotypes (Model 1)    |                       |             |                            |                        |
| G carriers                          | 1.00                  | (ref.)      | 1.00                       | (ref.)                 |
| AA                                  | 1.01                  | (0.61-1.65) | 0.89                       | (0.47-1.70)            |
|                                     | P <sup>1</sup> =0.981 |             | P <sup>1</sup> =0.680      | P <sup>1</sup> =0.563  |
| <i>FAIM2</i> genotypes (Model 2)    |                       |             |                            |                        |
| G carriers                          | 1.00                  | (ref.)      | 1.00                       | (ref.)                 |
| AA                                  | 0.98                  | (0.60-1.61) | 0.87                       | (0.46-1.64)            |
|                                     | P <sup>2</sup> =0.934 |             | P <sup>2</sup> =0.668      | P <sup>2</sup> =0.597  |

\*Composite end point including myocardial infarction, stroke and cardiovascular mortality

Model 1: Adjusted for sex, age, center and dietary intervention groups

Model 2: Adjusted for sex, age, center, dietary intervention groups, BMI, medications, type 2 diabetes, alcohol, smoking, total energy intake and physical activity

P<sup>1</sup>: P value obtained for the genotype effect (recessive model) of the polymorphism in the multivariable adjusted model 1. Cox regression models in the whole population or by type 2 diabetes

P<sup>2</sup>: P value obtained for the genotype effect (recessive model) of the polymorphism in the multivariable adjusted model 2. Cox regression models in the whole population or by type 2 diabetes

Additional adjustment of the models for hypertension (Model 3), did not change the statistical significance of the results

(P<sup>3</sup>: 0.069, 0.041 and 0.718 for the association between the *FAIM2* genotype and myocardial infarction in the whole population, in type 2 diabetic patients and in non-diabetic subjects, respectively)
